# Supplementary material for: Comparison of the Effects of DOTA and NOTA Chelators on 64Cu-Cudotadipep and 64Cu-Cunotadipep for Prostate Cancer
Source: MDPI journal article supplement (doi:10.3390/diagnostics13162649), 2023-08-11

## Supplementary Materials

### Comparison of the effects of DOTA and NOTA chelators on $^{64}\text{Cu}$ -cudotadipep and $^{64}\text{Cu}$ -cunotadipep for prostate cancer

Inki Lee<sup>1,†</sup>, Min Hwan Kim<sup>2,†</sup>, Kyongkyu Lee<sup>2</sup>, Keumrok Oh<sup>2</sup>, Hyunwoo Lim<sup>2</sup>, Jae Hun Ahn<sup>3,4</sup>, Yong Jin Lee<sup>3</sup>, Gi Jeong Cheon<sup>5</sup>, Dae Yoon Chi<sup>2,\*</sup>, Sang Moo Lim<sup>1,\*</sup>

<sup>1</sup> Department of Nuclear Medicine, Korea Institute of Radiological & Medical Sciences, Seoul 01812, Republic of Korea

<sup>2</sup> Research Institute of Radiopharmaceuticals, FutureChem Co., Ltd., Seoul 04793, Republic of Korea

<sup>3</sup> Division of Applied RI, Korea Institute of Radiological & Medical Sciences, Seoul 01812, Republic of Korea

<sup>4</sup> Graduate School of Translational Medicine, Seoul National University College of Medicine, Seoul 03080, Republic of Korea

<sup>5</sup> Department of Nuclear Medicine, Seoul National University College of Medicine, Seoul 03080, Republic of Korea

\*Correspondence: slim0328@nate.com, daeyoon.chi@futurechem.co.kr; Tel.: (82-2-970-2241 (S.M.L), 82-2-497-3114(D.Y.C))

<sup>†</sup>These authors contributed equally.

Table S1. *In vitro* stability of  $^{64}\text{Cu}$ -cudotadipep and  $^{64}\text{Cu}$ -cunotadipep.

| Time (hour) | $^{64}\text{Cu}$ -cudotadipep |             | $^{64}\text{Cu}$ -cunotadipep |             |
|-------------|-------------------------------|-------------|-------------------------------|-------------|
|             | Human serum                   | Mouse serum | Human serum                   | Mouse serum |
| 2           | 99.12±1.02                    | 99.50±0.09  | 97.98±0.23                    | 98.28±0.39  |
| 24          | 99.63±0.14                    | 99.67±0.43  | 99.11±0.22                    | 99.61±0.16  |
| 48          | 99.84±0.28                    | 99.49±0.08  | 98.43±0.18                    | 98.27±0.51  |

Table S2. Dosimetry of  $^{64}\text{Cu}$ -cudotadipep and  $^{64}\text{Cu}$ -cunotadipep based on biodistribution results in normal BALB/c mice.

|                          | Absorbed dose (mGy/MBq)                       |                                               |
|--------------------------|-----------------------------------------------|-----------------------------------------------|
|                          | $^{64}\text{Cu}$ -cudotadipep                 | $^{64}\text{Cu}$ -cunotadipep                 |
| Brain                    | $5.03 \times 10^{-2} \pm 6.34 \times 10^{-3}$ | $2.46 \times 10^{-3} \pm 3.46 \times 10^{-4}$ |
| Intestine                | $3.92 \times 10^{-1} \pm 1.02 \times 10^{-1}$ | $3.25 \times 10^{-2} \pm 2.23 \times 10^{-3}$ |
| Stomach                  | $4.71 \times 10^{-1} \pm 2.54 \times 10^{-1}$ | $3.69 \times 10^{-2} \pm 3.57 \times 10^{-3}$ |
| Heart                    | $1.32 \pm 4.96 \times 10^{-1}$                | $9.12 \times 10^{-2} \pm 7.58 \times 10^{-3}$ |
| Kidneys                  | $8.10 \pm 1.49$                               | $2.02 \pm 2.44 \times 10^{-1}$                |
| Liver                    | $1.27 \pm 4.32 \times 10^{-1}$                | $4.96 \times 10^{-2} \pm 3.89 \times 10^{-3}$ |
| Lungs                    | $7.67 \times 10^{-1} \pm 2.93 \times 10^{-1}$ | $5.69 \times 10^{-2} \pm 1.01 \times 10^{-2}$ |
| Muscle                   | $4.05 \times 10^{-2} \pm 9.16 \times 10^{-3}$ | $5.62 \times 10^{-3} \pm 5.56 \times 10^{-4}$ |
| Spleen                   | $1.54 \pm 2.83 \times 10^{-1}$                | $3.27 \times 10^{-1} \pm 1.68 \times 10^{-2}$ |
| Effective dose (mSv/MBq) | $3.67 \times 10^{-1} \pm 1.39 \times 10^{-1}$ | $3.00 \times 10^{-2} \pm 2.16 \times 10^{-3}$ |

Table S3. Tumor to non-target ratio of  $^{64}\text{Cu}$ -cudotadipep (A) and  $^{64}\text{Cu}$ -cunotadipep (B), analyzed by biodistribution data

### A. $^{64}\text{Cu}$ -cudotadipep

|                 | 2 h        | 6 h        | 24 h       | 48 h      |
|-----------------|------------|------------|------------|-----------|
| Tumor to blood  | 2.29±0.39  | 3.06±1.27  | 7.20±1.59  | 6.88±1.14 |
| Tumor to muscle | 10.23±1.57 | 14.94±7.32 | 20.50±8.17 | 9.39±3.22 |
| Tumor to liver  | 0.28±0.03  | 0.26±0.12  | 0.62±0.10  | 0.65±0.05 |
| Tumor to kidney | 0.35±0.06  | 0.27±0.13  | 0.59±0.11  | 0.43±0.05 |

### B. $^{64}\text{Cu}$ -cunotadipep

|                 | 2 h        | 6 h        | 24 h        | 48 h        |
|-----------------|------------|------------|-------------|-------------|
| Tumor to Blood  | 2.37±1.50  | 8.75±0.78  | 32.17±10.36 | 27.20±12.28 |
| Tumor to Muscle | 11.48±9.31 | 25.12±3.13 | 90.90±17.61 | 38.33±20.42 |
| Tumor to Liver  | 2.76±1.79  | 4.99±0.64  | 5.30±0.23   | 4.87±1.09   |
| Tumor to Kidney | 0.37±0.25  | 0.38±0.07  | 0.74±0.07   | 0.56±0.24   |

Figure S1. Comparison of PSMA binding affinity of  $^{64}\text{Cu}$ -cudotadipep and  $^{64}\text{Cu}$ -cunotadipep in PSMA-positive 22Rv1 cells.

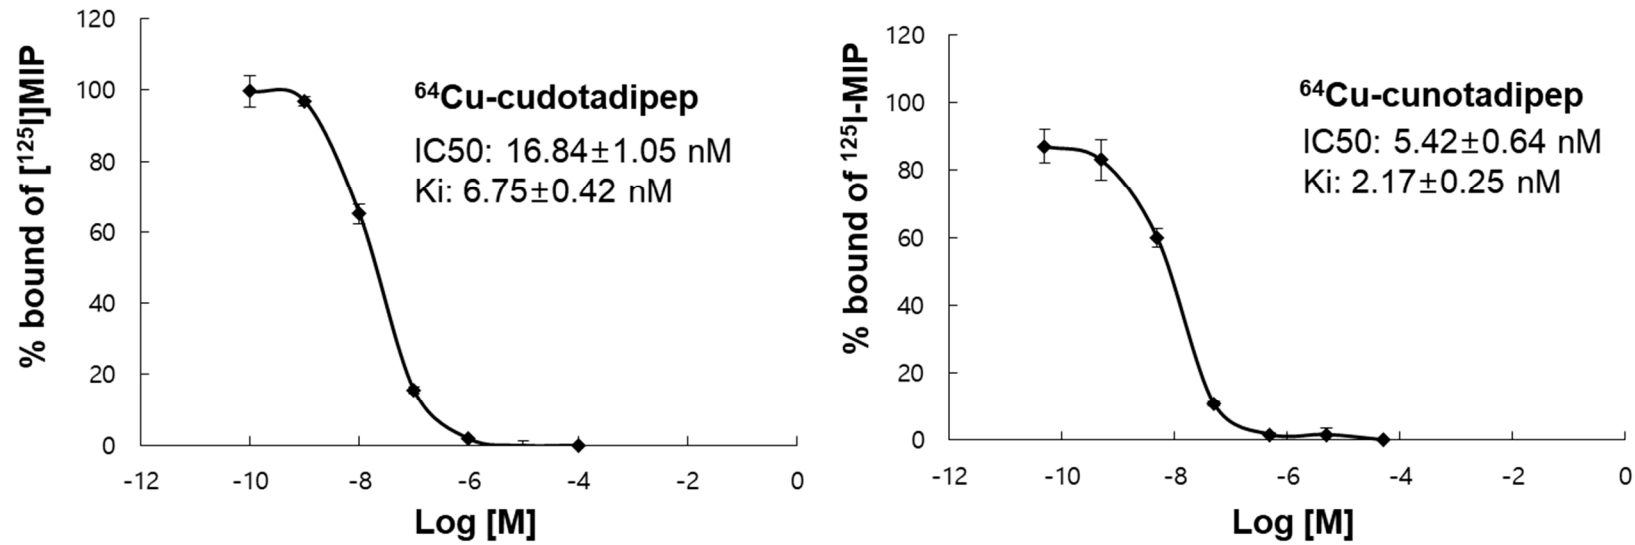

Figure S2. Comparison of uptakes of  $^{64}\text{Cu}$ -cudotadipep and  $^{64}\text{Cu}$ -cunotadipep in PSMA-positive prostate cancer cells (PC3-PIP) and PSMA-negative prostate cancer cells (PC3-flu).

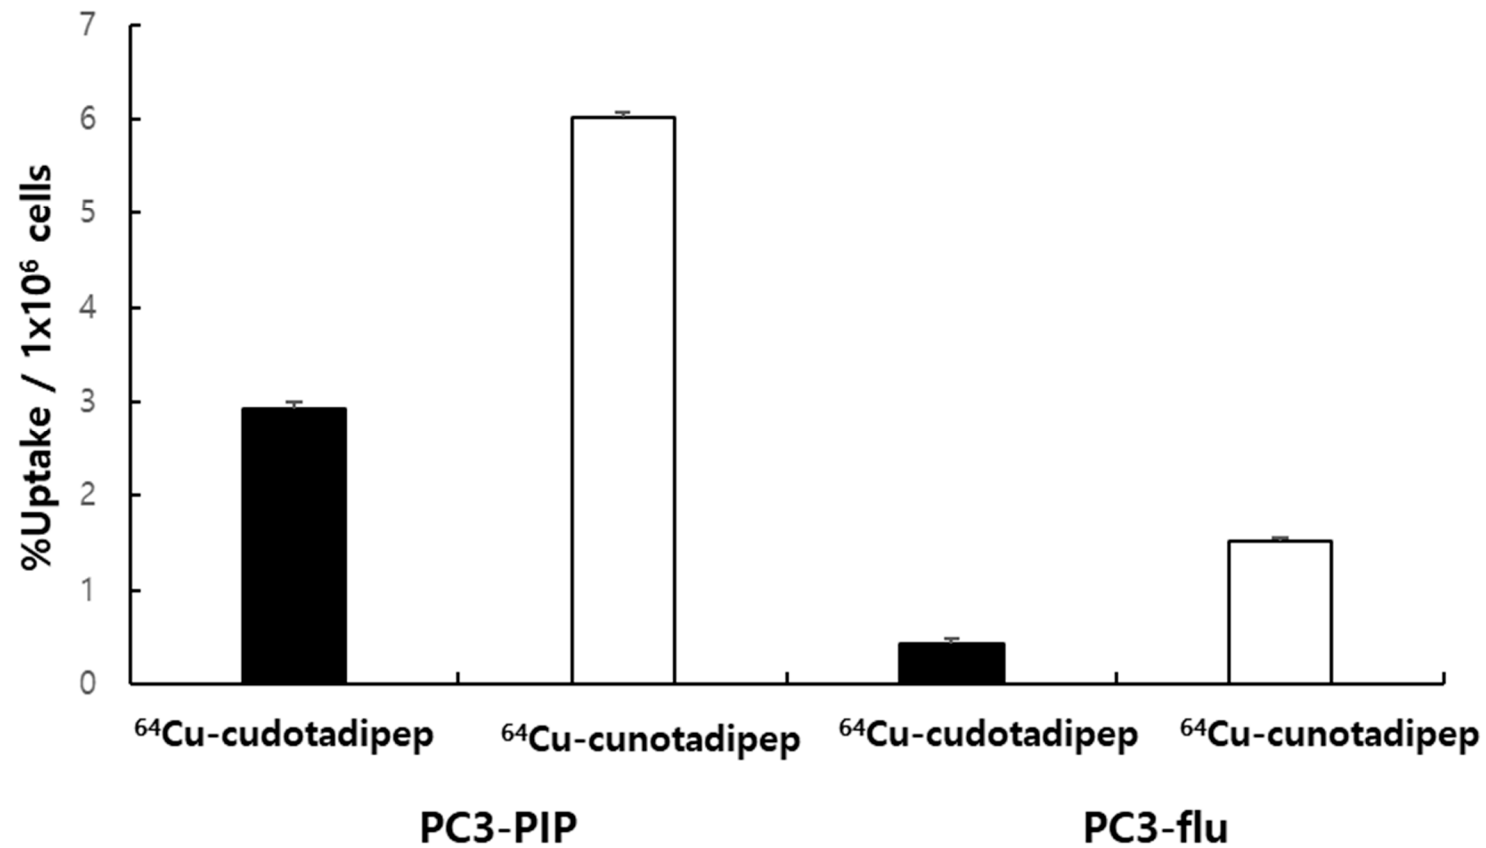

Figure S3. Radio-TLC results of *in vitro* stability in human and mouse serum of  $^{64}\text{Cu}$ -cudiotadipep and  $^{64}\text{Cu}$ -cunotadipep

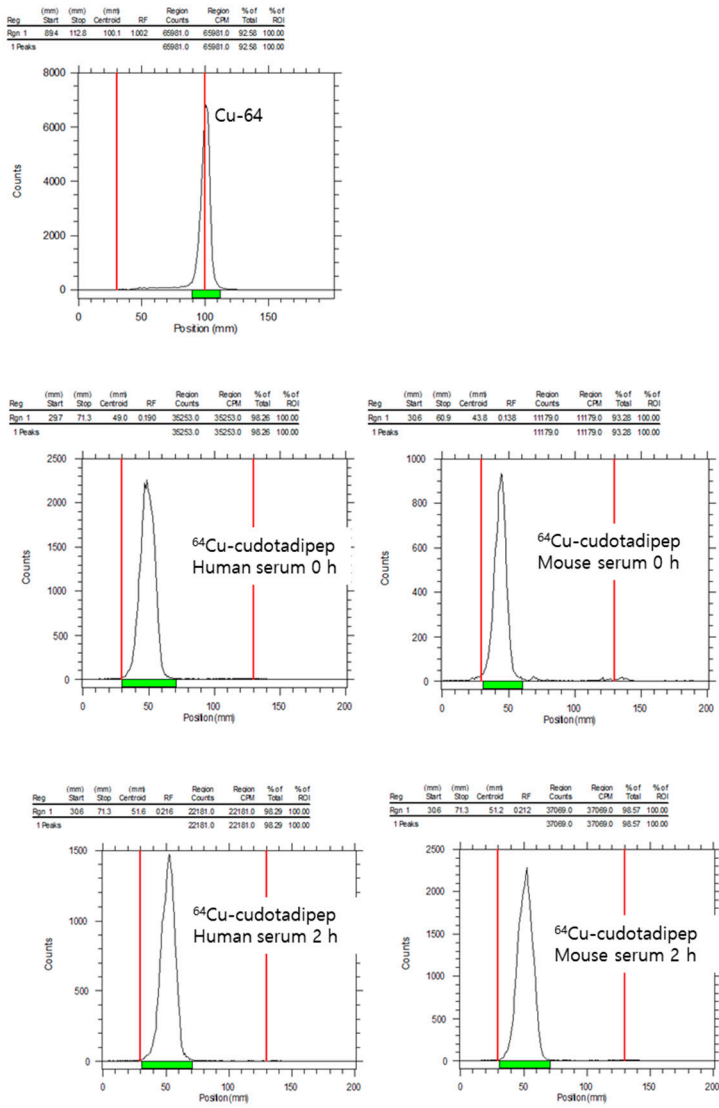

| Reg     | (mm)  | (mm) | (mm)     |       | Region  | Region  | % of  | % of   |
|---------|-------|------|----------|-------|---------|---------|-------|--------|
|         | Start | Stop | Centroid | RF    | Counts  | CPM     | Total | ROI    |
| Reg 1   | 30.6  | 75.6 | 54.6     | 0.249 | 23919.0 | 23919.0 | 97.96 | 100.00 |
| 1 Peaks |       |      |          |       | 23919.0 |         | 97.96 | 100.00 |

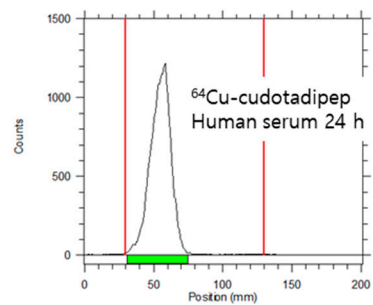

| Reg     | (mm)  | (mm) | (mm)     |       | Region | Region | % of  | % of   |
|---------|-------|------|----------|-------|--------|--------|-------|--------|
|         | Start | Stop | Centroid | RF    | Counts | CPM    | Total | ROI    |
| Reg 1   | 29.7  | 80.9 | 44.2     | 0.142 | 5450.0 | 5450.0 | 94.45 | 100.00 |
| 1 Peaks |       |      |          |       | 5450.0 |        | 94.45 | 100.00 |

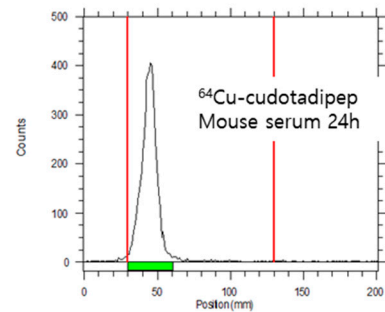

| Reg     | (mm)  | (mm) | (mm)     |       | Region | Region | % of  | % of   |
|---------|-------|------|----------|-------|--------|--------|-------|--------|
|         | Start | Stop | Centroid | RF    | Counts | CPM    | Total | ROI    |
| Reg 1   | 30.6  | 66.9 | 45.6     | 0.156 | 3449.0 | 3449.0 | 96.75 | 100.00 |
| 1 Peaks |       |      |          |       | 3449.0 |        | 96.75 | 100.00 |

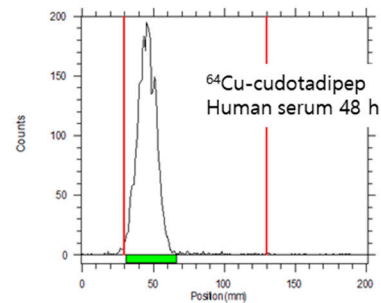

| Reg     | (mm)  | (mm) | (mm)     |       | Region | Region | % of  | % of   |
|---------|-------|------|----------|-------|--------|--------|-------|--------|
|         | Start | Stop | Centroid | RF    | Counts | CPM    | Total | ROI    |
| Reg 1   | 30.6  | 73.9 | 52.4     | 0.224 | 8626.0 | 8626.0 | 96.91 | 100.00 |
| 1 Peaks |       |      |          |       | 8626.0 |        | 96.91 | 100.00 |

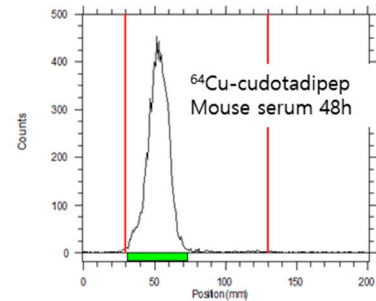



| Reg     | (mm)<br>Start | (mm)<br>Stop | (mm)<br>Centroid | RF    | Region<br>Counts | Region<br>CPM | % of<br>Total | % of<br>ROI |
|---------|---------------|--------------|------------------|-------|------------------|---------------|---------------|-------------|
| Rgn 1   | 89.4          | 112.8        | 100.1            | 1.002 | 65981.0          | 65981.0       | 92.58         | 100.00      |
| 1 Peaks |               |              |                  |       | 65981.0          | 65981.0       | 92.58         | 100.00      |

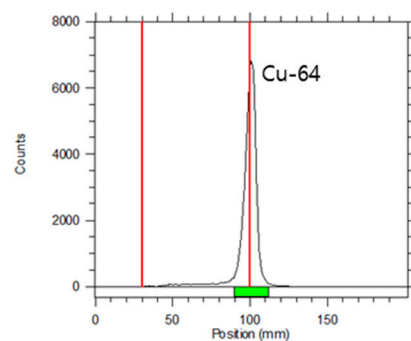

| Reg     | (mm)<br>Start | (mm)<br>Stop | (mm)<br>Centroid | RF    | Region<br>Counts | Region<br>CPM | % of<br>Total | % of<br>ROI |
|---------|---------------|--------------|------------------|-------|------------------|---------------|---------------|-------------|
| Rgn 1   | 29.7          | 63.5         | 42.6             | 0.126 | 20077.0          | 20077.0       | 91.29         | 100.00      |
| 1 Peaks |               |              |                  |       | 20077.0          | 20077.0       | 91.29         | 100.00      |

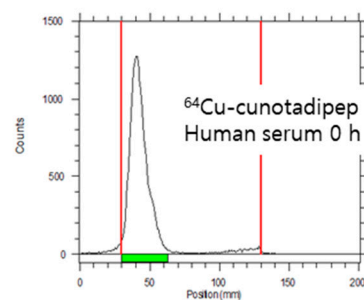

| Reg     | (mm)<br>Start | (mm)<br>Stop | (mm)<br>Centroid | RF    | Region<br>Counts | Region<br>CPM | % of<br>Total | % of<br>ROI |
|---------|---------------|--------------|------------------|-------|------------------|---------------|---------------|-------------|
| Rgn 1   | 30.6          | 66.1         | 42.2             | 0.122 | 39942.0          | 39942.0       | 96.13         | 100.00      |
| 1 Peaks |               |              |                  |       | 39942.0          | 39942.0       | 96.13         | 100.00      |

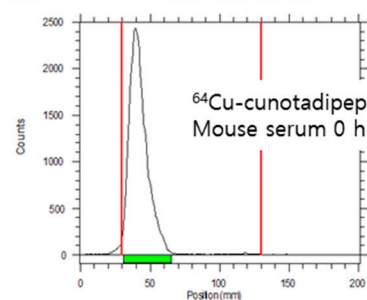

| Reg     | (mm)<br>Start | (mm)<br>Stop | (mm)<br>Centroid | RF    | Region<br>Counts | Region<br>CPM | % of<br>Total | % of<br>ROI |
|---------|---------------|--------------|------------------|-------|------------------|---------------|---------------|-------------|
| Rgn 1   | 30.6          | 68.7         | 44.4             | 0.144 | 57762.0          | 57762.0       | 95.14         | 98.03       |
| Rgn 2   | 114.5         | 142.2        | 127.7            | 0.977 | 1161.0           | 1161.0        | 1.91          | 1.97        |
| 2 Peaks |               |              |                  |       | 58923.0          | 58923.0       | 97.05         | 100.00      |

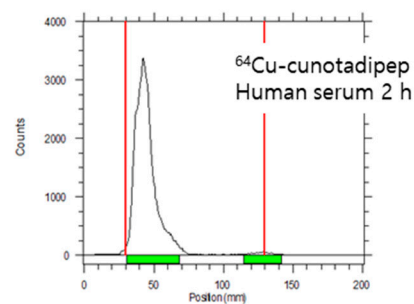

| Reg     | (mm)<br>Start | (mm)<br>Stop | (mm)<br>Centroid | RF    | Region<br>Counts | Region<br>CPM | % of<br>Total | % of<br>ROI |
|---------|---------------|--------------|------------------|-------|------------------|---------------|---------------|-------------|
| Rgn 1   | 29.7          | 60.9         | 41.1             | 0.101 | 65502.0          | 65502.0       | 96.57         | 98.57       |
| Rgn 2   | 124.9         | 146.7        | 135.4            | 0.958 | 949.0            | 949.0         | 1.43          | 1.43        |
| 2 Peaks |               |              |                  |       | 66451.0          | 66451.0       | 97.97         | 100.00      |

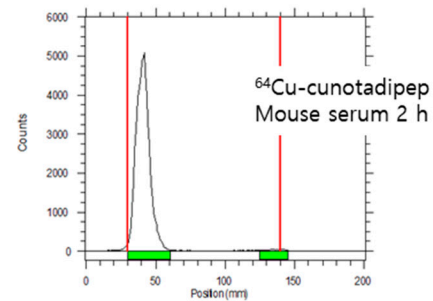

| Reg     | (mm)<br>Start | (mm)<br>Stop | (mm)<br>Centroid | RF    | Region<br>Counts | Region<br>CPM | % of<br>Total | % of<br>ROI |
|---------|---------------|--------------|------------------|-------|------------------|---------------|---------------|-------------|
| Rgn 1   | 29.7          | 71.3         | 45.2             | 0.152 | 61747.0          | 61747.0       | 96.75         | 100.00      |
| 1 Peaks |               |              |                  |       | 61747.0          | 61747.0       | 96.75         | 100.00      |

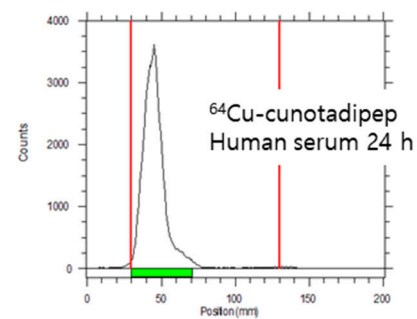

| Reg     | (mm)<br>Start | (mm)<br>Stop | (mm)<br>Centroid | RF    | Region<br>Counts | Region<br>CPM | % of<br>Total | % of<br>ROI |
|---------|---------------|--------------|------------------|-------|------------------|---------------|---------------|-------------|
| Rgn 1   | 29.7          | 71.3         | 45.0             | 0.150 | 17953.0          | 17953.0       | 95.90         | 100.00      |
| 1 Peaks |               |              |                  |       | 17953.0          | 17953.0       | 95.90         | 100.00      |

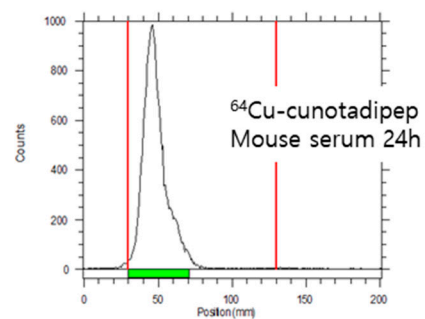

| Reg     | (mm)<br>Start | (mm)<br>Stop | (mm)<br>Centroid | RF    | Region<br>Counts | Region<br>CPM | % of<br>Total | % of<br>ROI |
|---------|---------------|--------------|------------------|-------|------------------|---------------|---------------|-------------|
| Rgn 1   | 29.7          | 61.7         | 44.1             | 0.141 | 4670.0           | 4670.0        | 94.09         | 100.00      |
| 1 Peaks |               |              |                  |       | 4670.0           | 4670.0        | 94.09         | 100.00      |

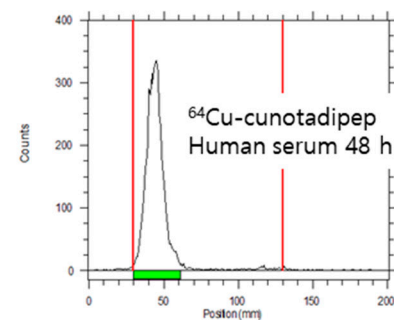

| Reg     | (mm)<br>Start | (mm)<br>Stop | (mm)<br>Centroid | RF    | Region<br>Counts | Region<br>CPM | % of<br>Total | % of<br>ROI |
|---------|---------------|--------------|------------------|-------|------------------|---------------|---------------|-------------|
| Rgn 1   | 26.3          | 57.4         | 38.7             | 0.087 | 4767.0           | 4767.0        | 94.58         | 100.00      |
| 1 Peaks |               |              |                  |       | 4767.0           | 4767.0        | 94.58         | 100.00      |

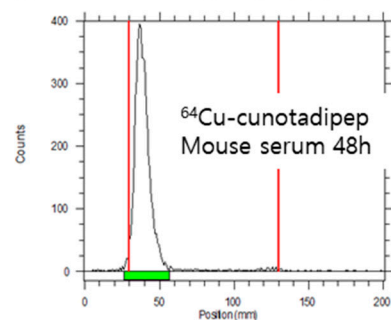

Figure S4. Comparison of  $^{64}\text{Cu}$ -cudotadipep (A) and  $^{64}\text{Cu}$ -cunotadipep (B) in major organs over time using a xenograft athymic nude BALB/c mice with PC3-PIP

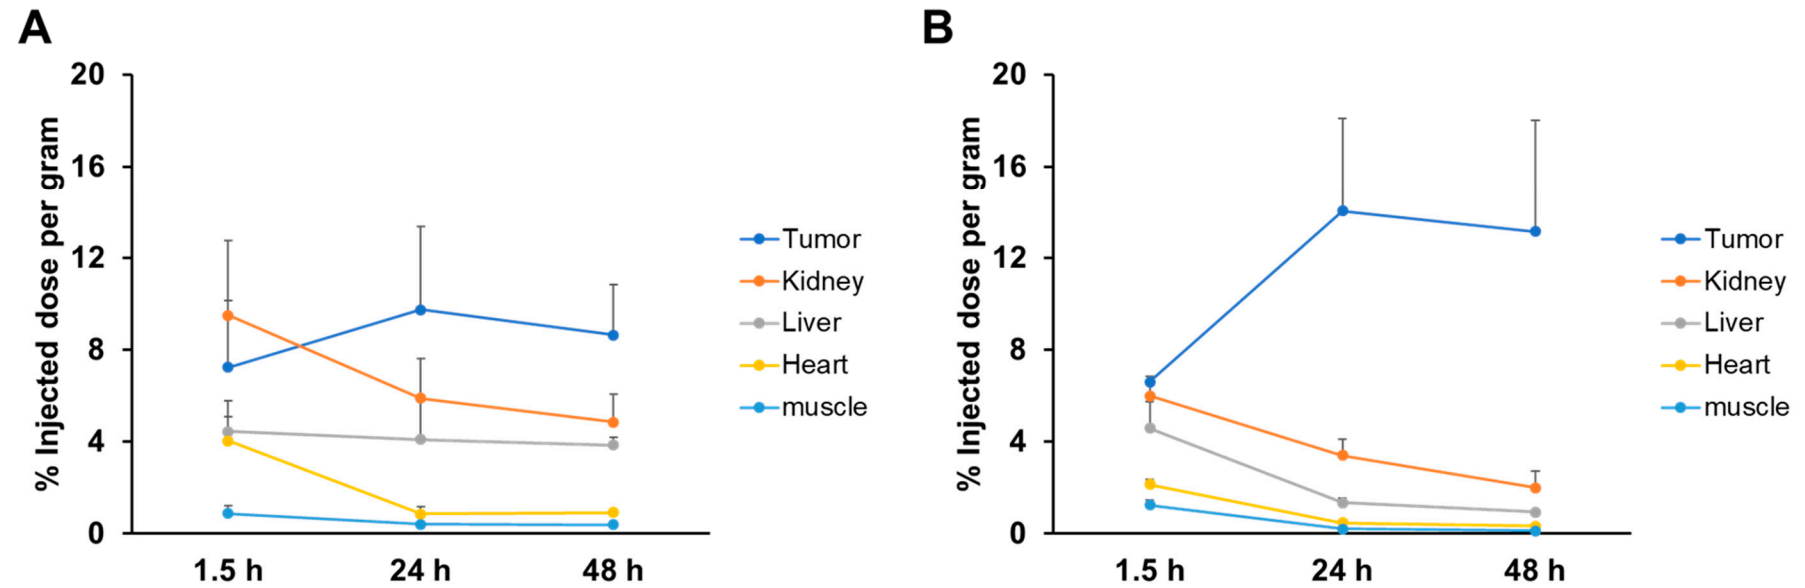

Supplement: s1 [file s1]
